# Supplementary material
Source: PubMed Central journal article supplement (PMC2706966)
Supplement: mmc1.pdf [file mmc1.pdf]

## **Supplemental Data**

### **Gene Conversion between the Male-Specific Regions of the Y and the X Chromosomes at a Translocation Hotspot**

Zoë H. Rosser, Patricia Balaesque, and Mark A. Jobling

#### *Contains:*

**Figure S1: DNA sequence alignment of X reference sequence, X with annotated SNPs, and Y reference sequence around *HAS***

**Figure S2: DNA sequence alignment of Chimpanzee X sequence (ChX\_HSA), Gorilla X sequence (GoX\_HSA), Human X reference sequence (HuX\_HSA), Human Y reference sequence (HuY\_HSA), and Chimpanzee Y sequence (ChY\_HSA) around *HSA***

**Table S1: Primer sequences**

**Table S2: Additional DNA samples sequenced around GSVs 40, 41, using Y-specific primers A4F and A2R**

**Figure S1: DNA sequence alignment of X reference sequence, X with annotated SNPs, and Y reference sequence around HSA**

Corresponds to chrX:3,681,612-3,683,501 and chrY:7,155,737-7,157,796 in Build 36.1.

- GSVs are numbered (1-66) below the alignment
- X-specific primers in magenta, Y-specific primers in blue
- 246-bp identity block in lilac
- GSVs showing evidence of conversion highlighted in blue
- dbSNP X-SNPs highlighted in green; those corresponding to GSVs highlighted in yellow
- Perfect Myers recombination motif' (CCNCCNTNNCCNC) boxed in black
- CpG dinucleotides at GSV sites boxed in red

```

XrefSeq      CAGAGTCCTATAATAACATAGGGGGTTTGTCTTTCAAAAAGAAAGAAGGAAGGAGGGGAA 60
XrefSNPs     CAGAGTCCTATAATTCATAGGGGGTTTGTCTTTCAAAAAGAAAGAAGGAAGGGAGGGAA 60
YrefSeq      CAGAGTCCTGTAATAACATAAGTGAAGTTTGTCTTTCAAAAAGAAAGAAGGAAGGGAGGGAA 60
             *****  ****  ****  *  *  *****

XrefSeq      GGGGGGACCTACCATTATTAAGAAGCTTGTCTACATTAGGCAATAAATGAGCTTTTCC 120
XrefSNPs     GGGGGGACCTACCATTATTAAGAAGCTTGTCTACCTTAGGCAATAAATGAGCTTTTCC 120
YrefSeq      GGGGGTGAACACTACGATTTATTAAGTAGCTTGTCTACATTAGGCAATAAGT-AGCTTTTCC 119
             *****  **  ****  *****  *****  *****  *  *****
             1  2  3  4  5  6

XrefSeq      CAAATTCCAAATGAAATCCATGTAGTTTTATAATGCTGCTGTAAAAA--TCACCACA 178
XrefSNPs     TAAATTCCAAATGAAATCATGTATGTTTTATAATGCTGCTGTAAAAA--TCACCACA 178
YrefSeq      CAAATTCCAAATGAAATCCATGTAGTTTTGTAACGCTGCTGTAAAAAATCACCACA 179
             *****  *****  *****  ****  ***  *****  *****
             7  8  9  10,11

XrefSeq      AACGTATGTGCCTAACACAAACAAATGTATTACAGTTTTAGAGGTCAGAAGCCCCACACG 238
XrefSNPs     AACGTATGTGCCTAACACAAACAAATGTATTACAGTTTTAGAGGTCAGAAGCCCCACACG 238
YrefSeq      AACGTATGTGCCTAACACTAACAAATGTATTATAGTTTTGGAGGTCAGAAGCCCTACACA 239
             *****  *****  *****  *****  *****  *****  *****
             12  13  14  15  16

XrefSeq      AGGCTCATGGAGATAAAATTAAGGTGTCGACTGGGCACAGTGGTTCACACTGGTAATCCC 298
XrefSNPs     AGGCTCATGGAGATAAAATTAAGGTGTCGACTGGGCACAGTGGTTCACACTGGTAATCCC 298
YrefSeq      AGGTTTCATGGAGTTAAATTAAGGTGTGACTGGGTACAGTGGCTGACACCTGTAATCTC 299
             ***  *****  *****  *****  *****  *****  *  ****  *****
             17  18  19  20  21  22  23,24  25

XrefSeq      AGCACTTTGGGAGGCTGAGGCAGGAGGATTGCTTGAGGCTAGGAGTTCACGACCAGCCTA 358
XrefSNPs     AGCACTTTGGGAGGCTGAGGCAGGAGGATTGCTTGAGGCTAGGAGTTCACGACCAGCCTA 358
YrefSeq      AGCACTTTGGGAGGCTGAGGCAGGAGGATTGCTTGAGGCCAGGAGTTCACACCAGCCTG 359
             *****  *****  *****  *****  *****  *****  *****
             26  27,28  29

XrefSeq      GGCAATAT-GCAAGACTCCCTGTCTACAAAAAATACTAAAAATTAGCTGAGTGTGTG 417
XrefSNPs     GGCAATAT-GCAAGACTCCCTGTCTACAAAAAATACTAAAAATTAGCTGAGTGTGTG 417
YrefSeq      GACACTATAGCAAGACTCCCTGTCTACAAAAAG-TACCAAAAAATTAGCTGGGTATGTG 418
             *  **  *  *  *****  *****  *****  *  *  *  *  *  *  *  *  *  *  *  *
             30  31  32  33,34  35  36  37  38,39

XrefSeq      TGCCTGCCTGTAGTCCCAGCTACTTGGGAGGGTGAGGTGGAAGGATCGCTTGAGCCCAGG 477
XrefSNPs     TGCCTGCCTGAGTCCCAGCTACTTGGGAGGGTGAGGTGGAAGGATCGCTTGAGCCCAGG 477
YrefSeq      TGCCTGCCTGTAGTCCCAGCTACTTGGGAGGGTGAGGTGGAAGGATCGCTTGAGCCCAGG 478
             *****  *****  *****  *****  *****  *****  *****
    
```

*continues on next page*

Figure S1 continued

XrefSeq AGCTCAAGGCTGCAGTGAGCCGTGATTGTAGCACTGTACTCCAGCCTGGGTGACAGAGAA 537  
XrefSNPs AGCTCAAGGCTGCAGTGAGCCGTGATTGTAGCACTGTACTCCAGCCTGGGTGACAGAGAA 537  
YrefSeq AGCTCAAGGCTGCAGTGAGCCGTGATTGTAGCACTGTACTCCAGCCTGGGTGACAGAGAG 538  
\*\*\*\*\*  
40

XrefSeq AGTTTCTGTCTCTTATGAAACCCAGGAGTGTGGTCTTTCTGGAGGCTGTGGGGAGGAT 597  
XrefSNPs AGTTTCTGTCTCTTATGAAACCCAGGAGTGTGGTCTTTCTGGAGGCTGTGGGGAGGAT 597  
YrefSeq AGATTCTGTCTCTTACAAAACCCAGGAGTGTGGTCTTTCTGGAGGCTGTGGGGAGGAT 598  
\*\* \*\*\*\*\*  
41 42, 43

XrefSeq CCGATTCCTTGCCTTCTTAGCTTCCAGCGTTTCCAAGCTCATGGCTCTCCCTCACTCGC 657  
XrefSNPs CCGATTCCTTGCCTTCTTAGCTTCCAGCGTTTCCAAGCTCATGGCTCTCCCTCACTCGC 657  
YrefSeq CCGTTTCTGCCTTCTTAGCTTCCAGCAATTCCAAGCTCATGGCTCTCCCTCACTCGC 657  
\*\*\* \*\* \* \*\*\*\*\*  
44 45 46 47 48 49

XrefSeq ATCTCAGCTTCCATTTTCATGTCTCCTTCTCCAACCTGGACCCTCCTGCCTCCCTCTTAG 717  
XrefSNPs ATCTCAGCTTCCATTTTCATGTCTCCTTCTCCAACCTGGACCCTCCTGCCTCCCTCTTAG 717  
YrefSeq ATCTCAGCTTCCATTTTCATGTCTCCTTCTCCAACCTGGACCCTCCTGCCTCCCTCTTAG 717  
\*\*\*\*\*

XrefSeq AAGGAGCCTGTGACGGCATTAGGGCCAACCTGGGTTCATCCAGGGGCATCTCCCATCTCA 777  
XrefSNPs AAGGAGCCTGTGACGGCATTAGGGCCAACCTGGGTTCATCCAGGGGCATCTCCCATCTCA 777  
YrefSeq AAGGAGCCTGTGACGGCATTAGGGCCAACCTGGGTTCATCCAGGGGCATCTCCCATCTCA 777  
\*\*\*\*\*

XrefSeq AGATCCTAACCTCATCTCATCTGCAAAGTCTCCTGACCGTGCAAGATCAGCTGTTCCC 837  
XrefSNPs AGATCCTAACCTCATCTCATCTGCAAAGTCTCCTGACCGTGCAAGATCAGCTGTTCCC 837  
YrefSeq AGATCCTAACCTCATCTCATCTGCAAAGTCTCCTGACCGTGCAAGATCAGCTGTTCCC 837  
\*\*\*\*\*

XrefSeq AGGTTCCAGGGATTAGATGTGGACATCTTTGGGGATCATATTCTACCTATCACAGTA 897  
XrefSNPs AGGTTCCAGGGATTAGATGTGGACATCTTTGGGGAAATCATTATTCTACCTATCACAGTA 897  
YrefSeq AGGTTCCAGGGATTAGATGTGGACATCTTTGGGGAGCCATTATTCTACCTATCACAGTA 897  
\*\*\*\*\*  
50, 51

XrefSeq GCCTATATGCTTTTCCCCAAAACCTCTCTGAAGTAACCACTGTTATCTCATCAGGCAA 957  
XrefSNPs GCCTATATGCTTTTCCCCAAAACCTCTCTGAAGTAACCACTGTTATCTCATCAGGCAA 957  
YrefSeq GCCTATATGCTTTTCCCCAAAACCTCTCTGAAGTAACCACTGTTACCTCATCAGGCAA 957  
\*\*\*\*\*  
52

XrefSeq AATTCTGAGACCCAGCCAAGTGAATTACTGTGGATAATATCACGTCAACTAGAAAGTGGC 1017  
XrefSNPs AATTCTGAGACCCAGCCAAGTGAATTACTGTGGATAATATCACGTCAACTAGAAAGTGGC 1017  
YrefSeq AATTCTGAGACCCAGCCAAGTGAATTACTGTGGATAATATCACGTCAACTAGAAAGTGGC 1017  
\*\*\*\*\*

XrefSeq CCCAGGTAGTCAGACCATATGCTTTTTCTTTTCTTCAACTTTTATTTAAGTCCGGGG 1077  
XrefSNPs CCCAGGTAGTCAGACCATATGCTTTTTCTTTTCTTCAACTTTTATTTAAGTCCGGGG 1077  
YrefSeq CCCAGGTAGTCAGACCATATGCTTTTTCTTTTCTTCAACTTTTATTTAAGTCCGGGG 1077  
\*\*\*\*\*  
53

XrefSeq GTATCAGTGCAGGCTGTGCAGGTTGTTTCAGAGGCAAACGTGGCCATGCTGCTTTGTTG 1137  
XrefSNPs GTATCAGTGCAGGCTGTGCAGGTTGTTTCAGAGGCAAACGTGGCCATGCTGCTTTGTTG 1137  
YrefSeq GTATCAGTGCAGGCTGTGCAGGTTGTTTCATAGGCAAACGTGGCCATGCTGCTTTGTTG 1137  
\*\*\*\*\*  
54

continues on next page

Figure S1 continued

XrefSeq TTTTTCACCTTTTAAATAATCGCCATTCCGACTGGCATGAGATAGCAACTCATTATGGTTT 1197  
XrefSNPs TTTTTCACCTTTTAAATAATCGCCATTCCGACTGGCATGAGATARCAACTCATTATGGTTT 1197  
YrefSeq TTTTTCACCTTTTAAATAATCGCCATTCCGACTGGCATGAGATAACAACACTCATTATGGTTT 1197  
\*\*\*\*\*

55

XrefSeq TCATGTACATTTTATTACCAGGTATTGAGCCTGGCATCCATTAGCTATTCTTCCTGATG 1257  
XrefSNPs TCATGTACATTTTATTACCAGGTATTGAGCCTGGCATCCATTAGCTATTCTTCCTGATG 1257  
YrefSeq TCATGTACATTTTATTACCAGGTATTGAGCCTGGCATCCATTAGCTATTCTTCCTGATG 1257  
\*\*\*\*\*

XrefSeq CTCTCCCTCCCCTGCGCCCCCTTACAACAGGCCCCAGAGTGTGCTCTTCCCCACAATGT 1317  
XrefSNPs CTCTCCCTCCCCTGCGCCCCCTTACAACAGGCCCCAGAGTGTGCTCTTCCCCACAATGT 1317  
YrefSeq CTCTCCCTCCCCTGCGCCCCCTTACAACAGGCCCCAGAGTGTGCTCTTCCCCACAATGT 1317  
\*\*\*\*\*

56

XrefSeq GTCCATGTGTTCTCATCGTTTCTCCCAATTATAAGTGAGAACATGCAGTGTGTTGGTTT 1377  
XrefSNPs GTCCATGTGTTCTCATCGTTTCTCCCAATTATAAGTGAGAACATGCAGTGTGTTGGTTT 1377  
YrefSeq GTCCATGTGTTCTCATCGTTTCTCCCAATTATAAGTGAGAACATGCAGTGTGTTGGTTT 1377  
\*\*\*\*\*

57

XrefSeq TCTCTCCTGTGTTAGTTTCTGAGGATAACAGCTTCCAGCTTCATCCACATTCTGCAA 1437  
XrefSNPs TCTCTCCTGTGTTAGTTTCTGAGGATAACAGCTTCCAGCTTCATCCACATTCTGCAA 1437  
YrefSeq TCTCTCCTGTGTTAGTTTCTGAGGATAACAGCTTCCAGCTTCATCCACATTCTGCAA 1437  
\*\*\*\*\*

58

XrefSeq AGGACATAATCTCACTCCTTTTTATGGCTGCATAGTATTCCATGGTGTCTATGGACCACA 1497  
XrefSNPs AGGACATAATCTCACTCCTTTTTATGGCTGCATAGTATTCCATGGTGTCTATGGACCACA 1497  
YrefSeq AGGACATAATCTCACTCCTTTTTATGGCTGCATAGTATTCCATGGTGTCTATGGACCACA 1497  
\*\*\*\*\*

XrefSeq TTTTCTCTGTCAGTCTACCACTGATGGTCATTTGGATTGATCCCCTGTTGTTGCTATCA 1557  
XrefSNPs TTTTCTCTGTCAGTCTACCACTGATGGTCATTTGGATTGATCCCCTGTTGTTGCTATCA 1557  
YrefSeq TTTTCTCTGTCAGTCTACCACTGATGGTCATTTGGATTGATCCCCTGTTGTTGCTATCA 1557  
\*\*\*\*\*

59

60

XrefSeq TGAATAGTGCAGTGAACATACACGCTATGTATCTTTATAATAGAGTAATTTACAGT 1617  
XrefSNPs TGAATAGTGCAGTGAACATACACGCTATGTATCTTTATAATAGAGTAATTTACAGT 1617  
YrefSeq TGAATAGTGCAGTGAACATACACGCTATGTATCTTTATAATAGAGTAATTTACAGT 1617  
\*\*\*\*\*

61

62

XrefSeq CCTTTGAGTATATACCCAGCAATAGGATTGGTGGGTAAATGATAGTTTTCCTCTAGAT 1677  
XrefSNPs CCTTTGAGTATATACCCAGCAATAGGATTGGTGGGTAAATGATAGTTTTCCTCTAGAT 1677  
YrefSeq CCTTTGAGTATATACCCAGCAATAGGATTGGTGGGTAAATGATAGTTTTCCTCTAGAT 1677  
\*\*\*\*\*

XrefSeq CTTTGAGAAATCACCACACTCTCCACAATGGTTGAACTAATTTACACTCCCACCAATAG 1737  
XrefSNPs CTTTGAGAAATCACCACACTCTCCACAATGGTTGAACTAATTTACACTCCCACCAATAG 1737  
YrefSeq CTTTGAGAAATCACCACACTCTCCACAATGGTTGAACTAATTTACACTCCCACCAATAG 1737  
\*\*\*\*\*

XrefSeq TGTAAAAGCCTTCCTTTTCTCTGCAACCTCACCAGCTTCTGTTGGTTTTGACTTTTTTA 1797  
XrefSNPs TGTAAAAGCCTTCCTTTTCTCTGCAACCTCACCAGCTTCTGTTGGTTTTGACTTTTTTA 1797  
YrefSeq TGTAAAAGCCTTCCTTTTCTCTGCAACCTCACCAGCTTCTGTTGGTTTTGACTTTTTTA 1797  
\*\*\*\*\*

63

64

65

continues on next page

**Figure S1 continued**

```
XrefSeq      ATAATTGCCATTCTGACTGGTGTGAGATGGTCTCTCATTGTGGTTTTGATTTGCATTCCT 1857
XrefSNPs     ATAATTGCCATTCTGACTGGTGTGAGATGGTCTCTCATTGTGGTTTTGATTTGCATTCCT 1857
YrefSeq      ATAATTGCCATTCTGACTGGCGTGAGATGGTCTCTCATTGTGGTTTTGATTTGCATTCCT 1857
*****
```

66

```
XrefSeq      CTAATCAGACCATATCTTATCTTATTGTAAGTC 1890
XrefSNPs     CTAATCAGACCATATCTTATCTTATTGTAAGT- 1889
YrefSeq      CTAATCGGACCATATCCTATCTTCTTGCAAGTA 1890
*****
```

**Figure S2: DNA sequence alignment of Chimpanzee X sequence (ChX\_HSA), Gorilla X sequence (GoX\_HSA), Human X reference sequence (HuX\_HSA), Human Y reference sequence (HuY\_HSA), and Chimpanzee Y sequence (ChY\_HSA) around HSA**

Corresponds to chrX:3,681,612-3,683,501 and chrY:7,155,737-7,157,796 in human Build 36.1

- Human 246-bp identity block in **lilac**
- Human GSVs showing evidence of conversion in **red**
- Sites showing simple X-Y divergence highlighted in **green**; those showing clear evidence of gene conversion from inter-specific comparisons highlighted in **yellow**; those interpretable as X-GSVs arising prior to human-chimp divergence in **blue**

Conversion types are indicated, based on the most parsimonious deductions, assuming no recurrent mutation. Ambiguity is introduced by alternative assumptions that can be made about ancestral states prior to the human-chimp divergence. Note that identifying X-to-Y conversions unambiguously is not possible in the absence of a gorilla Y sequence.

- a:** Human Y-to-X conversion
- b:** Human GSV then conversion, direction unknown; or, opposite human and chimp conversions
- c:** Chimp GSV then conversion, direction unknown; or, opposite human and chimp conversions
- d:** X-GSV arising in chimp-human common ancestor followed by human X-to-Y conversion; or, opposite human and gorilla conversions

Sources of great ape *HSA* sequences are as follows:

- **ChY\_HSA:** the chimpanzee ortholog of the Y-specific human *HSA* sequence was retrieved as a single hit by BLAST search with the human Y copy as query. ChY\_HSA is part of contig NW\_001252928.1.
- **ChX\_HSA:** the chimpanzee ortholog of the X-specific human *HSA* sequence was retrieved as a gapped hit by BLAST search with the human X copy as query, part of contig NW\_001251693.1. The 463-bp gap in this sequence was filled by searching the trace archive with the available chimp X sequence, and retrieving a reverse-complement bridging sequence, ti | 1255561336.
- **GoX\_HSA:** the gorilla ortholog of the X-specific human *HSA* sequence was retrieved by searching the trace archive with the human X sequence, and retrieving four sequences allowing an assembly, as follows: ti | 2019343614 reverse-complement; ti | 167684544; ti | 2037316608; ti | 2033233512 reverse-complement. The gorilla sequenced was a female, so all retrieved traces must map to the X.

|         |                                                               |     |
|---------|---------------------------------------------------------------|-----|
| ChX_HSA | CAGAGTCCTATAATACATAGGGGGGTTTGTCTTTCAAAAAGAAAGAAGGAAGGGAGGGAA  | 60  |
| GoX_HSA | CAGAGTCCTATAATACATAGGTTGGGTTTGTCTTTCAAAAAGAAAGAAGGAAGGGAGGGAA | 60  |
| HuX_HSA | CAGAGTCCTATAATACATAGGGGGGTTTGTCTTTCAAAAAGAAAGAAGGAAGGGAGGGAA  | 60  |
| HuY_HSA | CAGAGTCCTGTAATACATAAGTGGTGTCTTTCAAAAAGAAAGAAGGAAGGGAGGGAA     | 60  |
| ChY_HSA | CAGAGTCCTATAATACATAAGTGGTGTCTTTCAAAAAGAAAGAAGGAAGGGAGGGAA     | 60  |
|         | ***** * * *****                                               |     |
| ChX_HSA | GGGGGGACCTACCATTATTA AAAAGCTTGCTACATTAGGCAATAAATGAGCTTTTCC    | 120 |
| GoX_HSA | GGGGGGACCTACCATTATTAAGAAGCTTGCTACATTAGGCAATAAATGAGCTTTTCC     | 120 |
| HuX_HSA | GGGGGGACCTACCATTATTAAGAAGCTTGCTACATTAGGCAATAAATGAGCTTTTCC     | 120 |
| HuY_HSA | GGGGGGAAGTACGATTTATTAAGTAGCTTGCTACATTAGGCAATAAGT-AGCTTTTCC    | 119 |
| ChY_HSA | GGGGGGAAGTACGATTTATTAAGTAGCTTGCTACATTAGGCAATAAGT-AGCTTTTCC    | 119 |
|         | ***** ** ***** * *****                                        |     |
| ChX_HSA | CAAATCCCAAATGAAATCCATGTTAGTTTTATAATGCTGCTGTA AAAAA--TCACCACA  | 178 |
| GoX_HSA | CAAATCCCAAATGAAATCCATGTTAGTTTTATAATGCTGCTGTA AAAAA--TCACCACA  | 178 |
| HuX_HSA | CAAATCCCAAATGAAATCCATGTTAGTTTTATAATGCTGCTGTA AAAAA--TCACCACA  | 178 |
| HuY_HSA | CAAATCCCAAATGAAATCCATGTTAGTTTTGTAAGCTGCTGTA AAAAAAATCACCACA   | 179 |
| ChY_HSA | CAAATCCCAAATGAAATCCATGTTAGTTTTGTAAGCTGCTGTA AAAAAA--TCACCACA  | 178 |
|         | ***** ***** * * *****                                         |     |
| ChX_HSA | AACGTATGTGCCTAACACAACAAATGTATTACAGTTTTAGAGGTCAGAAGCCCCACACG   | 238 |
| GoX_HSA | AACGTATGTGCCTAACACAACAAAGTATTACAGTTTTAGAGGTCAGAAGCCCCACACG    | 238 |
| HuX_HSA | AACGTATGTGCCTAACACAACAAATGTATTACAGTTTTAGAGGTCAGAAGCCCCACACG   | 238 |
| HuY_HSA | AACGTATGTGCCTAACACAAACAAATGTATTACAGTTTTAGAGGTCAGAAGCCCCACACG  | 239 |
| ChY_HSA | AACGTATGTGCCTAACACAAACAAATGTATTACAGTTTTAGAGGTCAGAAGCCCCACACG  | 238 |
|         | ***** ***** * * *****                                         |     |

*continues on next page*

Figure S2 continued

```

ChX_HSA      AGGCTCATGGAGATAAAATTAAGGTGTCGACTGGGCACAGTGGTTCACACTGGTAATCCC 298
GoX_HSA      AGGCTCATGGAGATAAAATTAAGGTGTCGACTGGGCACAGTGGTTCACACTGGTAATCCC 298
HuX_HSA      AGGCTCATGGAGATAAAATTAAGGTGTCGACTGGGCACAGTGGTTCACACTGGTAATCCC 298
HuY_HSA      AGGTCATGGAGTTAAATTAAGGTGTGACTGGGTACAGTGGCTACACCTGTAATCTC 299
ChY_HSA      AGGTCATGGAGTTAAATTAAGGTGTGACTGGGTACAGTGGCTACACCTGTAATCTC 298
***          *****

ChX_HSA      AGCACTTTGGGAGGCTGAGGCAGGAGGACTGCTTGAGGCTAGGAGTTCAGACCAGCCTA 358
GoX_HSA      AGCACTTTGGGAGGCTGAGGCAGGAGGATTGCTTGAGGCTAGGAGTTCAGACCAGCCTA 358
HuX_HSA      AGCACTTTGGGAGGCTGAGGCAGGAGGATTGCTTGAGGCTAGGAGTTCAGACCAGCCTA 358
HuY_HSA      AGCACTTTGGGAGGCTGAGGCAGGAGGATTGCTTGAGGCTAGGAGTTCAGACCAGCCTC 359
ChY_HSA      AGCACTTTGGGAGGCTGAGGCAGGAGGATTGCTTGAGGCTAGGAGTTCAGACCAGCCTC 358
*****

ChX_HSA      GGCAATAT-GCAAGACTCCCTGTCTACAAAAAA-TACTAAAAATTAGCTGAGTGTGTGG 416
GoX_HSA      GGCAATAT-GCAAGACTCCCTGTCTACAAAAAA-TACTAAAAATTAGCTGAGTGTGTGG 416
HuX_HSA      GGCAATAT-GCAAGACTCCCTGTCTACAAAAAA-TACTAAAAATTAGCTGAGTGTGTGG 417
HuY_HSA      GACACTATAGCAAGACTCCCTGTCTACAAAAAG-TACCAAAAATTAGCTGGTGTGTGG 418
ChY_HSA      GACACTATAGCAAGACTCCCTGTCTACAAAAAG-TACCAAAAATTAGCTGAGTGTGTGG 417
* * * * *

ChX_HSA      TGCCTGCCTGTAGTCCCAGCTACTTGGGAGGGTGAGGTGGAAGGATCGCTTGAGCCCAGG 476
GoX_HSA      TGCCTGCCTGTAGTCCCAGCTACTTGGGAGGGTGAGGTGGAAGGATCGCTTGAGCCCAGG 476
HuX_HSA      TGCCTGCCTGTAGTCCCAGCTACTTGGGAGGGTGAGGTGGAAGGATCGCTTGAGCCCAGG 477
HuY_HSA      TGCCTGCCTGTAGTCCCAGCTACTTGGGAGGGTGAGGTGGAAGGATCGCTTGAGCCCAGG 478
ChY_HSA      TGCCTGCCTGTAGTCCCAGCTACTTGGGAGGGTGAGGTGGAAGGATCGCTTGAGCCCAGG 477
*****

ChX_HSA      AGCTCAAGGCTGCATTGAGCCGTGATTGTAGCACTGTACTCCAGCCTGGGTGACAGAGAA 536
GoX_HSA      AGCTCAAGGCTGCAGTGAAGCCGTGATTGTAGCACTGTACTCCAGCCTGGGTGACAGAGAA 536
HuX_HSA      AGCTCAAGGCTGCAGTGAAGCCGTGATTGTAGCACTGTACTCCAGCCTGGGTGACAGAGAA 537
HuY_HSA      AGCTCAAGGCTGCAGTGAAGCCGTGATTGTAGCACTGTACTCCAGCCTGGGTGACAGAGAA 538
ChY_HSA      AGATCAAGGCTGCAGTGAAGCCATAATTGTAGTACTGTACTCCAGCCTGGGTGACAGAGAA 537
**          *****

ChX_HSA      AGTTTCTGTCTCTTATGAAACCCATCAGTGTGGTCTTTCTGGAGGCTGTGGGGAGGAT 596
GoX_HSA      AGTTTCTGTCTCTTATGAAACCCATCAGTGTGGTCTTTCTGGAGGCTGTGGGGAGGAT 596
HuX_HSA      AGTTTCTGTCTCTTATGAAACCCATCAGTGTGGTCTTTCTGGAGGCTGTGGGGAGGAT 597
HuY_HSA      AGTTTCTGTCTCTTACAAAACCCAGGAGTGTGGTCTTTCTGGAGGCTGTGGGGAGGAT 598
ChY_HSA      AGATTCTGTCTCTTACAAAACCCAGGAGTGTGGTCTTTCTGGAGGCTGTGGGGAGGAT 597
**          *****

aa

ChX_HSA      CTATTTCCTTGCCCTTTTTTAGCTTCCAGCATTTCCAAGCTCATGGCTCTCCCTCACTCGC 656
GoX_HSA      CCGTTTCCTTGCCCTTTTTTAGCTTCCAGCATTTCCAAGCTCATGGCTCTCCCTCACTCGC 656
HuX_HSA      CCGATTCCCTTGCCCTTTTAGCTTCCAGCGTTCCAAGCTCATGGCTCTCCCTCACTCGC 657
HuY_HSA      CCGTTTCCT-GCCTTTTAGCTTCCAGCATTTCCAAGCTCATGGCTCTCCCTCACTCGC 657
ChY_HSA      CTGTTTCCTTGCCCTTTTTTAGCTTCCAGCATTTCCAAGCTCATGGCTCTCCCTCACTCGC 657
|          *****

c          d          d

ChX_HSA      ATCTCAGCTTTC-----CATGTCTCCCTTCTCCAATTTAGGACCCGCTGCCTCCCTCT 711
GoX_HSA      ATCTCAGCTTCCATTTTCATGTCTCC-TTCTCCAATTT-GGACCC-TCCTGCCTCCCTCT 713
HuX_HSA      ATCTCAGCTTCCATTTTCATGTCTCC-TTCTCCAATTT-GGACCC-TCCTGCCTCCCTCT 714
HuY_HSA      ATCTCAGCTTCCATTTTCATGTCTCC-TTCTCCAATTT-GGACCC-TCCTGCCTCCCTCT 714
ChY_HSA      ATCTCAGCTTCCATTTTCATGTCTCC-TTCTCCAATTT-GGACCC-TCCTGCCTCCCTCT 714
*****

b
    
```

continues on next page

Figure S2 continued

```

ChX_HSA      -AGAAGGAGCCTGTGACGGCATTAGGGCCCAACCTGGGTTCATCCAGGGGCATCTCCCAT 770
GoX_HSA      TAGAAGGAGCCTGTGACGGCATTAGGGCC-AGCCTGGGTTCATCCAGGGGCATCTCCCAT 772
HuX_HSA      TAGAAGGAGCCTGTGACGGCATTAGGGCC-AACCTGGGTTCATCCAGGGGCATCTCCCAT 773
HuY_HSA      TAGAAGGAGCCTGTGACGGCATTAGGGCC-AACCTGGGTTCATCCAGGGGCATCTCCCAT 773
ChY_HSA      TAGAAGGAGCCTGTGACGGCATTAGGGCC-AACCTGGGTTCATCCAGGGGCATCTCCCAT 773
              *****

ChX_HSA      CTCAAGATCCTTAACCTCATCACATCTGCAAAGTCCCCTGATGGTGCAAGATCAGCTGT 830
GoX_HSA      CTCAAGATCCTTAACCTCATCACATCTGCAAAGTCCCCTGACCGTGCAAGACCAGCTGT 832
HuX_HSA      CTCAAGATCCTTAACCTCATCACATCTGCAAAGTCCCCTGACCGTGCAAGATCAGCTGT 833
HuY_HSA      CTCAAGATCCTTAACCTCATCACATCTGCAAAGTCCCCTGACCGTGCAAGATCAGCTGT 833
ChY_HSA      CTCAAGATCCTTAACCTCATCACATCTGCAAAGTCCCCTGATGGTGCAAGATCAGCTGT 833
              *****

              b          b          cc

ChX_HSA      TCCCAGGTTCCAGGGATTCAGATGTGGACATCTTTGGGGAACCATTTCTTACCTATCAC 890
GoX_HSA      TCCCAGGTTCCAGGGATTCAGATGTGGACATCTTTGGGGAACCATTTCTTACCTATCAC 892
HuX_HSA      TCCCAGGTTCCAGGGATTCAGATGTGGACATCTTTGGGGAATCATTATTCTTACCTATCAC 893
HuY_HSA      TCCCAGGTTCCAGGGATTCAGATGTGGACATCTTTGGGGAACCATTTCTTACCTATCAC 893
ChY_HSA      TCCCAGGTTCCAGGGATTCAGATGTGGACATCTTTGGGGAACCATTTCTTACCTATCAC 893
              *****

              a

ChX_HSA      AGTAGCCTATATGCTTTCCCCCCAAAACCTCTCTGAAGTAACCCCTGTTATCTCATCAG 950
GoX_HSA      AGTAGCCTATATGCTTTTCCCCAAAACCTCTCTGAAGTAACCACTGTTATCTCATCAG 952
HuX_HSA      AGTAGCCTATATGCTTTTCCCCAAAACCTCTCTGAAGTAACCACTGTTATCTCATCAG 953
HuY_HSA      AGTAGCCTATATGCTTTTCCCCAAAACCTCTCTGAAGTAACCACTGTTACCTCATCAG 953
ChY_HSA      AGTAGCCTATATGCTTTCCCCCCAAAACCTCTCTGAAGTAACCACTGTTATCTCATCAG 953
              *****

              cc

ChX_HSA      CAAAAATTCTGAGACCCAGCCAAGTGAATTACTGTGGATAATATCACGTCAACTAGAAAG 1010
GoX_HSA      CAAAAATTCTGAGACCCAGCCAAGTGAATTACTGTGGATAATATCACGTCAACTAGAAAG 1012
HuX_HSA      CAAAAATTCTGAGACCCAGCCAAGTGAATTACTGTGGATAATATCACGTCAACTAGAAAG 1013
HuY_HSA      CAAAAATTCTGAGACCCAGCCAAGTGAATTACTGTGGATAATATCACGTCAACTAGAAAG 1013
ChY_HSA      GAAAAATTCTGAGTCCCAGCCAAGTGAATTACTGTGGATAATATCACGTCAACTAGAAAG 1013
              *****

ChX_HSA      TGGCCCCAGGTAGTCAGACCATATCCTTTTTCTTTTCCTTCAACTTTTATTTTAAGTCC 1070
GoX_HSA      TGGCCCCAGGTAGTCAGACCATATCCTTTTTCTTTTCCTTCAACTTTTATTTTAAGTCC 1072
HuX_HSA      TGGCCCCAGGTAGTCAGACCATATGCTTTTTCTTTTCCTTCAACTTTTATTTTAAGTCC 1073
HuY_HSA      TGGCCCCAGGTAGTCAGACCATATGCTTTTTCTTTTCCTTCAACTTTTATTTTAAGTCC 1073
ChY_HSA      TGGCCCCAGGTAGTCAGACCATATCCTTTTTCTTTTCCTTTGACTTTTATTTTAAGTCC 1073
              *****

              b

ChX_HSA      AGGGGTATCAGTGCAGGCTGTGCAGGTTGTTTCATAGGCAAACGTGGGCCATGCTGCTTT 1130
GoX_HSA      AGGGGTATCAGTGCAGGCTGTGCAGGTTGTTTCATAGGCAAACGTGGGCCATGCTGCTTT 1132
HuX_HSA      GGGGTATCAGTGCAGGCTGTGCAGGTTGTTTCAGAGGCAAACGTGGGCCATGCTGCTTT 1133
HuY_HSA      GGGGTATCAGTGCAGGCTGTGCAGGTTGTTTCATAGGCAAACGTGGGCCATGCTGCTTT 1133
ChY_HSA      AGGGGTATCAGTGCAGGCTGTGCAGGTTGTTTCACAGGCAAACGTGGGCCATGCTGCTTT 1133
              *****

              b

ChX_HSA      GTTGTTTTTCACCTTTTAAATAATCGCCATTCGACTGGCATGAGATAGCAACTCATTATG 1190
GoX_HSA      GTTGTTTTTCACCTTTTAAATAATCGCCATTCGACTGGCATGAGATAGCAACTCATTATG 1192
HuX_HSA      GTTGTTTTTCACCTTTTAAATAATCGCCATTCGACTGGCATGAGATAGCAACTCATTATG 1193
HuY_HSA      GTTGTTTTTCACCTTTTAAATAATCGCCATTCGACTGGCATGAGATAACAACCTCATTATG 1193
ChY_HSA      GTTGTTTTTCACCTTTTAAATAATCGCCATTCGACTGGCATGAGATAGCAACTCATTATG 1193
              *****
    
```

continues on next page



Figure S2 continued

```

ChX_HSA      GTTTTCATGTACATTTTCATTACCCAGGTATTGAGCCTGGCATCCATTAGCTATTCTTCCT 1250
GoX_HSA      GTTTTCATGTACATTTTCATTACCCAGGTATTGAGCCTGGCATCCATTAGCTATTCTTCCT 1252
HuX_HSA      GTTTTCATGTACATTTTCATTACCCAGGTATTGAGCCTGGCATCCATTAGCTATTCTTCCT 1253
HuY_HSA      GTTTTCATGTACATTTTCATTACCCAGGTATTGAGCCTGGCATCCATTAGCTATTCTTCCT 1253
ChY_HSA      GTTTTCATGTACATTTTCATTACCCAGGTATTGAGCCTGGCATCCATTAGCTATTCTTCCT 1253
*****

ChX_HSA      GATGCTCTCCCTCCCCCTGCGCCCCCTCACAAACAGGCCCCAGAGTGTGCTCTTCCCCACA 1310
GoX_HSA      GATGCTCTCCCTCCCCCTGCGCCCCCTTACAACAGGCCCCAGAGTGTGCTCTTCCCCACA 1312
HuX_HSA      GATGCTCTCCCTCCCCCTGCGCCCCCTTACAACAGGCCCCAGAGTGTGCTCTTCCCCACA 1313
HuY_HSA      GATGCTCTCCCTCCCCCTGCGCCCCCTTACAACAGGCCCCAGAGTGTGCTCTTCCCCACA 1313
ChY_HSA      GATGCTCTCCCTCCCCCTGCGCCCCCTCACAAACAGGCCCCAGAGTGTGCTCTTCCCCACA 1313
*****

c

ChX_HSA      ATGTGTCCATGTGTTCTCATCGTTCAGCTCCCAATTATAAGTGAGAACATGCAGTGTGTTG 1370
GoX_HSA      ATGTGTCCATGTGTTCTCATCGTTCAGCTCCCAATTATAAGTGAGAACACGCAGTGTGTTG 1372
HuX_HSA      ATGTGTCCATGTGTTCTCATCGTTCAGCTCCCAATTATAAGTGAGAACATGCAGTGTGTTG 1373
HuY_HSA      ATGTGTCCATGTGTTCTCATCGTTCAGCTCCCAATTATAAGTGAGAACATGCAGTGTGTTG 1373
ChY_HSA      ATGTGTCCATGTGTTCTCATCGTTCAGCTCCCAATTATAAGTGAGAACATGCAGTGTGTTG 1373
*****

ChX_HSA      GTTTTCTCTTCCCTGTGTTAGTTTCCTGAGGATAACAGCTTCCAGCTTCATCCACGTTCCCT 1430
GoX_HSA      GTTTTCTCTTCCCTGTGTTAGTTTCCTGAGGATAACAGCTTCCAGCTTCATCCATGTTCCCT 1432
HuX_HSA      GTTTTCTCTTCCCTGTGTTAGTTTCCTGAGGATAACAGCTTCCAGCTTCATCCACATTCCT 1433
HuY_HSA      GTTTTCTCTTCCCTGTGTTAGTTTCCTGAGGATAACAGCTTCCAGCTTCATCCACGTTCCCT 1433
ChY_HSA      GTTTTCTCTTCCCTGTGTTAGTTTCCTGAGGATAACAGCTTCCAGCTTCATCCACGTTCCCT 1433
*****

ChX_HSA      GCAAAGGACATAATCTCACTCCTTTTTATGGCTGCATAGTGTCCATGGTGTCTATGGAC 1490
GoX_HSA      GCAAAGGACATAATCTCACTCCTTTTTATGACTGCATAGTATTCATGGTGTCTATGGAC 1492
HuX_HSA      GCAAAGGACATAATCTCACTCCTTTTTATGGCTGCATAGTATTCATGGTGTCTATGGAC 1493
HuY_HSA      GCAAAGGACATAATCTCACTCCTTTTTATGGCTGCATAGTATTCATGGTGTCTATGGAC 1493
ChY_HSA      GCAAAGGACATAATCTCACTCCTTTTTATGGCTGCATAGTGTCCATGGTGTCTATGGAC 1493
****

c

ChX_HSA      CACATTTTCTCTATCCAGTCTACCACTGATGGTCATTTGGGTTGATCCCGTGTGTTGCT 1550
GoX_HSA      CACATTTTCTTATCCAGTCTACCACTGATGGTCATTTATGTTGATCCCATGTTGTTGCT 1552
HuX_HSA      CACATTTTCTCTGTCCAGTCTACCACTGATGGTCATTTGGATTGATCCCGTGTGTTGCT 1553
HuY_HSA      CACATTTTCTCTATCCAGTCTACCACTGATGGTCATTTGGGTTGATCCCGTGTGTTGCT 1553
ChY_HSA      CACATTTTCTCTATCCAGTCTACCACTGATGGTCATTTGGGTTGATCCCGTGTGTTGCT 1553
*****

ChX_HSA      ATCATGAATAGTGCTGCAGTGAACATACAGTCTATGTATCTTTATAATAGAGTAATTTA 1610
GoX_HSA      ACTGTGAATAGTGCTGCAATGAACATACAGTCTATGTATCTTTATAATAGAGTAATTTA 1612
HuX_HSA      ATCATGAATAGTGCTGCAGTGAACATACAGTCTATGTATCTTTATAATAGAGTAATTTA 1613
HuY_HSA      ATCATGAATAATGCTGCAGTGAACATACAGTCTATGTATCTTTATAATAGAGTAATTTA 1613
ChY_HSA      CTCATGAATAGTGCTGCAGTGAACATACAGTCTATGTATCTTTATAATAGAGTAATTTA 1613
*****

ChX_HSA      TAGTCCTTTGAGTATATACCCAGCAATAGGATTGGTGGGTAAATGATAGTTTTGCCTCT 1670
GoX_HSA      TAGTCCTTTGAGTATATACCCAGCAATAGGATTGGTGGGTAAATGATAGTTTTGCCTCT 1672
HuX_HSA      CAGTCCTTTGAGTATATACCCAGCAATAGGATTGGTGGGTAAATGATAGTTTTGCCTCT 1673
HuY_HSA      TAGTCCTTTGAGTATATACCCAGCAATAGGATTGGTGGGTAAATGATAGTTTTGCCTCT 1673
ChY_HSA      TAGTCCTTTGAGTATATACCCAGCAATAGGATTGGTGGGTAAATGATAGTTTTGCCTCT 1673
*****

```

continues on next page

Figure S2 continued

```
ChX_HSA      AGATCTTTGAGAAATCACCACACTCTCCCACAATGGTTGAACTAATTTACATTTCCCACCA 1730
GoX_HSA      AGATCTTTGAGAAATCACCACACTCTCCCACAATGGTTGAACTAATTTACACTCCCACCA 1732
HuX_HSA      AGATCTTTGAGAAATCACCACACTCTCCCACAATGGTTGAACTAATTTACACTCCCACCA 1733
HuY_HSA      AGATCTTTGAGAAATCACCACACTCTCCCACAATGGTTGAACTAATTTACACTCCCACCA 1733
ChY_HSA      AGATCTTTGAGAAATCACCACACTCTCCCACAATGGTTGAACTAATTTACATTTCCCACCA 1733
*****
```

c

```
ChX_HSA      ATAGTGTA AAAAGCCTTCCTTTTTCTCTGCAACCTCACCAGCTTCTGTTGGTTTTTGACTT 1790
GoX_HSA      ATAGTGTA AAAAGCCTTCCTTTTTCTCTGCAACCTCACCAGCTTCTGTTGGTTTTTGACTT 1792
HuX_HSA      ATAGTGTA AAAAGCCTTCCTTTTTCTCTGCAACCTCACCAGCTTCTGTTGGTTTTTGACTT 1793
HuY_HSA      ATAGTGTA AAAAGCCTTCCTTTTTCTCTGCAACCTCACCAGCTTCTGTTGGTTTTTGACTT 1793
ChY_HSA      ATAGTGTA AAAAGCCTTCCTTTTTCTCTGCAACCTCACCAGCTTCTGTTGGTTTTTGACTT 1793
*****
```

```
ChX_HSA      TTTAATAATTGCCATTCCTGACCGGTGTGAGATGGTCTCTCATTGTGGTTTTGATTGCAT 1850
GoX_HSA      TTTAATAATTGCCATTCCTGACTGGTGTGAGATGGTCTCTCATTGTGGTTTTGATTGCAT 1852
HuX_HSA      TTTAATAATTGCCATTCCTGACTGGTGTGAGATGGTCTCTCATTGTGGTTTTGATTGCAT 1853
HuY_HSA      TTTAATAATTGCCATTCCTGACTGGCGTGAGATGGTCTCTCATTGTGGTTTTGATTGCAT 1853
ChY_HSA      TTTAATAATTGCCATTCCTGACGGGTGTGAGATGGTCTCTCATTGTGGTTTTGATTGCAT 1853
***** * *****
```

```
ChX_HSA      TCCTCTAATCAGACCATATCTTATCTTATTGTAAGT- 1886
GoX_HSA      TCCTCTAATCAGACCATATCTTATCTTACTGTAAGTC 1889
HuX_HSA      TCCTCTAATCAGACCATATCTTATCTTATTGTAAGTC 1890
HuY_HSA      TCCTCTAATCGGACCATATCCTATCTTCTTGCAAGTA 1890
ChY_HSA      TCCTCTAATCAGACCATATCTTATCTTATTGTAAGT- 1889
***** ***** ** *****
```

**Table S1: Primer sequences**

\* X- and Y-specificity was verified using male and female samples, and X- and Y-specific somatic hybrid cell-line DNAs.

† PCR conditions were: 94°C 30s, 64°C 30s, 70°C 1min 30s; 32 cycles, with the buffer system of Jeffreys et al. (1990) Cell 60, 473-485.

Sequenced amplicons in all cases encompassed switches from GSVs normally specific for one sex chromosome, to GSVs normally specific for the other, so PCR product contamination could be excluded as an explanation for apparent conversions.

| Primer    | Sequence (5' to 3')                 | Notes                                                          |
|-----------|-------------------------------------|----------------------------------------------------------------|
| Y-HSAf1*† | CAG AGT CCT GTA ATA CAT AAG TGA     | Y-specific HSA amplification                                   |
| Y-HSAr*†  | TGC AAG AAG ATA GGA TAT GGT CC      | Y-specific HSA amplification                                   |
| X-HSAf2*† | CAG AGT CCT ATA ATA CAT AGG GGG     | X-specific HSA amplification                                   |
| X-HSAr1*† | GAC TTA CAA TAA GAT AAG ATA TGG TCT | X-specific HSA amplification                                   |
| HSAseq4   | ATG GAA GCT GAG ATG CGA GT          | Universal sequencing primer                                    |
| HSAseq6   | CTG GTT CTT TCT GGA GGC TG          | Universal sequencing primer                                    |
| HSAseq15  | CTC ATC AGG CAA AAA TTC TGA         | Universal sequencing primer                                    |
| HSAseq16  | CAA CCT GCA CAG CCT GCA CTG         | Universal sequencing primer                                    |
| HSAseq17  | GTG AGA ACA TGC AGT GTT TGG         | Universal sequencing primer                                    |
| HSAseq18  | ACG TGT ATG TTC ACT GCA GCA         | Universal sequencing primer                                    |
| A4F*      | GGT ACA GTG GCT GAC ACC T           | Y-specific primer for targeted resequencing around GSVs 40, 41 |
| A2R*      | TGC TGG AAA CTA AAA AAG GCA G       | Y-specific primer for targeted resequencing around GSVs 40, 41 |

**Table S2: Additional DNA samples sequenced around GSVs 40, 41, using Y-specific primers A4F and A2R**

Following discovery of an X-to-Y conversion tract covering GSVs 40-43 in YCC4, an additional 32 hgQ chromosomes from diverse populations were analysed (not shown), but no other examples of this conversion tract were observed.

| <b>Name</b> | <b>Population</b> | <b>Haplogroup</b>    |
|-------------|-------------------|----------------------|
| GB1757      | British           | A1a                  |
| YCC35       | Namibian, Tsumkwe | A2b                  |
| YCC5        | Namibian, Tsumkwe | A2c                  |
| YCC38       | Namibian, Tsumkwe | A3b1                 |
| YCC42       | S. African, Zulu  | B2a1a                |
| KRG7        | Central Asian     | C3c                  |
| YCC8        | Zaire, Mbuti      | E2b1a1               |
| YCC55       | Russian, Adygean  | G2a*                 |
| H744        | Nepalese          | H1a*                 |
| H542        | Nepalese          | H1a*                 |
| YCC56       | Russian, Adygean  | J2a12                |
| YCC10       | Melanesian Nasioi | M2a                  |
| GB1078      | British           | T                    |
| GB1151      | British           | T                    |
| H1930       | Bhutanese         | L                    |
| H1973       | Bhutanese         | L                    |
| YCC77       | Japanese          | N1a                  |
| YCC47       | Siberian Yakut    | N1c*                 |
| YCC51       | Siberian Yakut    | N1c1b                |
| YCC67       | Chinese, Han      | O1a1*                |
| YCC69       | Cambodia Khmer    | O2a*                 |
| YCC4        | US, Amerindian    | Q*(xQ1a1,Q1a2,Q1a3a) |
| YCC70       | Russian           | R1a1                 |
